# Supplementary material for: Irreversible inhibition of BTK kinase by a novel highly selective inhibitor CHMFL-BTK-11 suppresses inflammatory response in rheumatoid arthritis model
Source: PubMed Central journal article supplement (PMC5428509; doi:10.1038/s41598-017-00482-4), 2017-03-28
Supplement: 41598_2017_482_MOESM1_ESM.pdf [file 41598_2017_482_MOESM1_ESM.pdf]

## Supplemental Materials

### Irreversible inhibition of BTK kinase by a novel highly selective inhibitor CHMFL-BTK-11 suppresses inflammatory response in rheumatoid arthritis model

Hong Wu<sup>1,2,7</sup>, Qiong Huang<sup>3,7</sup>, Ziping Qi<sup>1,7</sup>, Yongfei Chen<sup>1,7</sup>, Aoli Wang<sup>1,2,7</sup>, Cheng Chen<sup>1</sup>, Qianmao Liang<sup>1,4</sup>, Jinghua Wang<sup>5</sup>, Wensheng Chen<sup>3</sup>, Jin Dong<sup>3</sup>, Kailin Yu<sup>1,2</sup>, Chen Hu<sup>1,2</sup>, Wenchao Wang<sup>1</sup>, Xiaochuan Liu<sup>1,4</sup>, Yuanxin Deng<sup>1</sup>, Li Wang<sup>1,2</sup>, Beilei Wang<sup>1,2</sup>, Xiaoxiang Li<sup>6</sup>, Nathanael S. Gray<sup>5</sup>, Jing Liu<sup>1\*</sup>, Wei Wei<sup>3\*</sup>, Qingsong Liu<sup>1,2\*</sup>

1. High Magnetic Field laboratory, Chinese Academy of Sciences, Mailbox 1110, 350 Shushanhu Road, Hefei 230031, Anhui, P. R. China
2. University of Science and Technology of China, P. R. China, Anhui, Hefei, 230036, P. R. China
3. Institute of Clinical Pharmacology, Anhui Medical University, Key Laboratory of Anti-inflammatory and Immune Medicine, Ministry of Education, Anhui collaborative innovation center of anti-inflammatory and immune medicine, Hefei, 230032, P.R. China
4. Department of Chemistry, University of Science and Technology of China, Anhui, Hefei, 230036, P. R. China
5. Department of Biological Chemistry & Molecular Pharmacology, Harvard Medical School, 250 Longwood Ave, SGM 628, Boston, MA 02115, USA.
6. Anhui New Star Pharmaceutical Inc. Science Road 110, Hefei, Anhui, 230000, P. R. China
7. These authors contribute equally

Correspondence:

Jing Liu, Ph.D, Email: [jingliu@hmfl.ac.cn](mailto:jingliu@hmfl.ac.cn)

Wei Wei, Ph.D, Email: [wwei@ahmu.edu.cn](mailto:wwei@ahmu.edu.cn)

Qingsong Liu, Ph.D, Email: [qslu97@hmfl.ac.cn](mailto:qslu97@hmfl.ac.cn)

Table of Contents:

Chemical synthesis and characterization of CHMFL-BTK-11

**Supplemental Figure 1:** Quantification of CHMFL-BTK-11/12 effect on the in vitro BTK wt/C481S mutant assay.

**Supplemental Figure 2:** CHMFL-BTK-11/12 and PCI-32765 effect on the phospho-P65 in the anti-IgM stimulated human PBMC.

**Supplemental Figure 3:** CHMFL-BTK-11/12, PCI-32765 and MTX effects on the secretion of IL-1 $\beta$ , IL-17A and TNF- $\alpha$ .

**Supplemental Figure 4:** CHMFL-BTK-11/12, PCI-32765 anti-proliferative effects on the human MH7A cell line and rat arthritis synovial cells.

**Supplemental Table 1:** Kinome wide selectivity profiling of CHMFL-BTK-11

**Supplemental Table 2:** The standards of arthritis global assessment\* of AA rats

**Supplemental Table 3:** The evaluation standards of arthritis index\* of AA rats

**Supplemental Table 4:** The evaluation standards of quantification of H&E staining

### Chemical synthesis and characterization of CYF-2-11 (CHMFL-BTK-11)

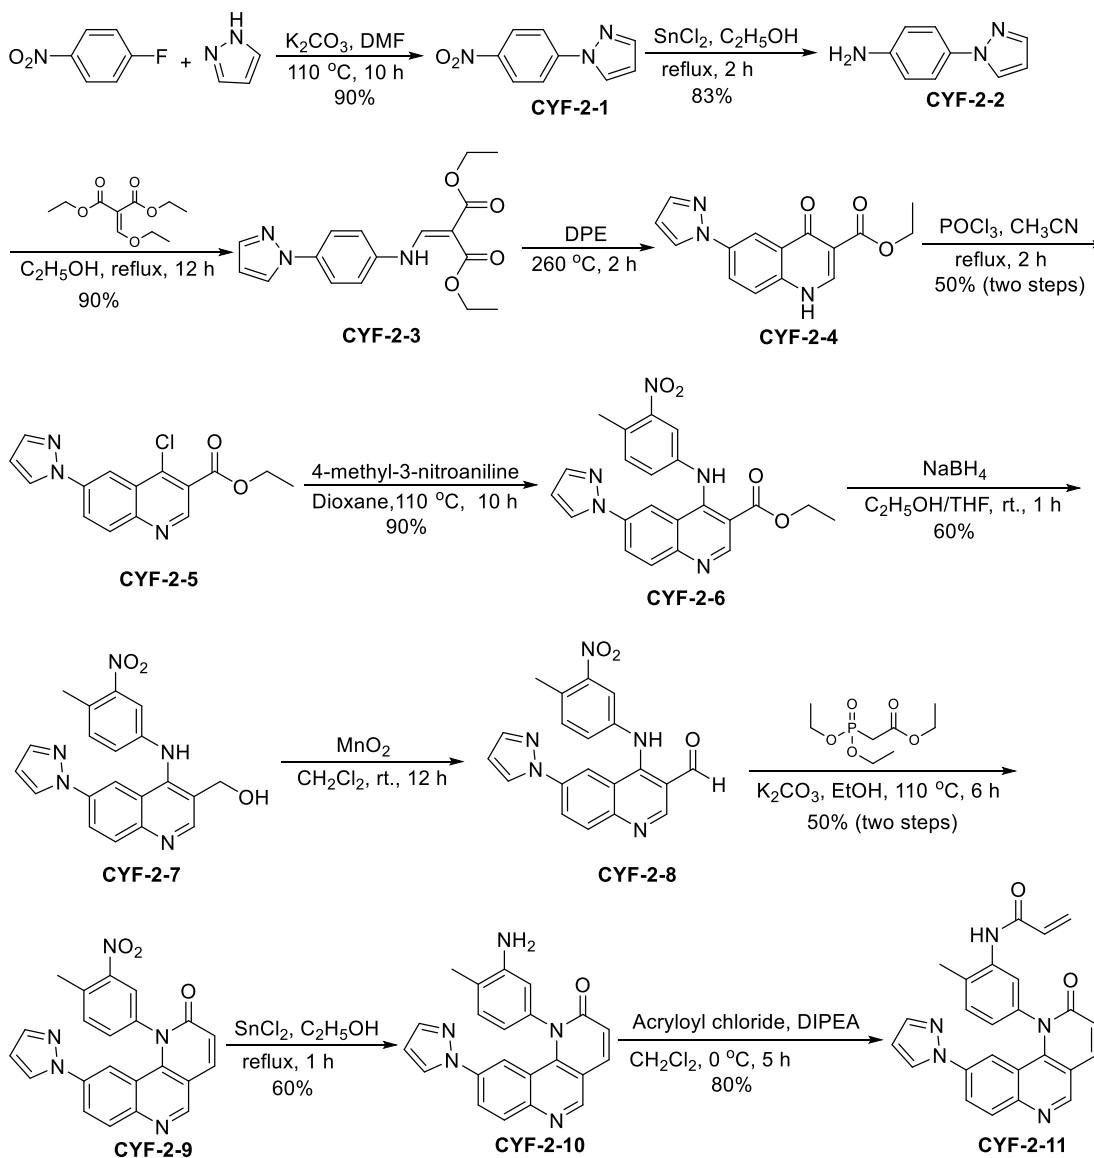

#### 1-(4-nitrophenyl)-1H-pyrazole (CYF-2-1)

A mixture of pyrazole (12 mmol, 0.82 g), 4-fluoro-1-nitrobenzene (10 mmol, 1.41 g), potassium carbonate (15 mmol, 2.07 g) in N,N-dimethylformamide (20 mL) was heated

## Supplemental Materials

at 110 °C for 10 hours and then cooled to room temperature. The reaction mixture was poured into water (100ml) and filtered. The filter cake was washed with water to give 1-(4-nitrophenyl)-1*H*-pyrazole (CYF-2-1) (1.70 g, 90% yield) as pale yellow crystals. <sup>1</sup>H-NMR (400 MHz, DMSO)  $\delta$  8.75 (s, 1H), 8.36 (d, *J* = 4.0 Hz, 2H), 8.14 (d, *J* = 4.4 Hz, 2H), 7.90 (s, 1H), 6.67 (s, 1H); MS (ESI): *m/z* (M+H)<sup>+</sup> 190.0614.

### **4-(1*H*-pyrazol-1-yl)aniline (CYF-2-2)**

SnCl<sub>2</sub>·2H<sub>2</sub>O (13.1g, 50 mmol) was added to a solution of 4-(3-nitrophenyl)-1*H*-pyrazole (0.95 g, 5 mmol) in EtOH (50 mL). The reaction mixture was refluxed for 2 hours and then cooled to room temperature. The reaction mixture was neutralized with 1 N NaOH to pH = 8 and extracted with EtOAc. The combined organic layers were washed with brine, dried over anhydrous Na<sub>2</sub>SO<sub>4</sub>, and concentrated to afford the crude product **CYF-2-2** (0.66 g, 83% yield). MS (ESI): *m/z* (M+H)<sup>+</sup> 160.0877.

### **Diethyl 2-(((4-(1*H*-pyrazol-1-yl)phenyl)amino)methylene)malonate (CYF-2-3)**

A mixture of 1-phenyl-5-aminopyrazole (0.64 g, 4 mmol) and diethyl ethoxymethylenemalonate (1.3 g, 6 mmol) was refluxed in EtOH (15 mL) for 12 hours. After cooling, the reaction mixture was filtered to afford the desired product **CYF-2-3** (1.20 g, 90% yield). <sup>1</sup>H-NMR (400 MHz, DMSO)  $\delta$  10.78 (d, *J* = 13.6 Hz, 1H), 8.50 (s, 1H), 8.43 (d, *J* = 13.2 Hz, 1H), 7.85 (s, 2H), 7.75 (s, 1H), 7.52 (d, *J* = 4.0 Hz, 2H), 6.54 (s, 1H), 4.22 (s, 2H), 4.13 (s, 1H), 1.26 (s, 6H); MS (ESI): *m/z* (M+H)<sup>+</sup> 330.1450.

### **Ethyl 4-chloro-6-(1*H*-pyrazol-1-yl)quinoline-3-carboxylate (CYF-2-5)**

**CYF-2-3** (1.00 g, 3 mmol) was added to diphenyl ether (30 mL) and the reaction mixture heated to 260 °C for 2 h. After cooling, the corresponding solid was isolated as a gray–white solid by filtration and washing with cold petroleum. The resultant solid (0.50 g, 1.8 mmol) and POCl<sub>3</sub> (0.55 g, 3.6 mmol) in MeCN (2 mL) was refluxed for 2 h. Excess POCl<sub>3</sub> was removed under reduced pressure and the crude residue was neutralized with saturated sodium bicarbonate solution (100 mL) and extracted with ethyl acetate. The organic layer was dried over Na<sub>2</sub>SO<sub>4</sub>, filtered and evaporated under reduced pressure. The residue was purified by column chromatography to afford the desired product **CYF-2-5** (0.45 g, 50% yield, two steps). <sup>1</sup>H-NMR (400 MHz, DMSO)  $\delta$  9.14 (d, *J* = 1.6 Hz,

## Supplemental Materials

1H), 8.86 (d,  $J = 2.4$  Hz, 1H), 8.74 (d,  $J = 2.0$  Hz, 1H), 8.56 (dd,  $J = 9.6, 2.4$  Hz, 1H), 8.30 (d,  $J = 9.6$  Hz, 1H), 7.91 (s, 1H), 6.68 (d,  $J = 2.0$  Hz, 1H), 4.45 (q,  $J = 7.2$  Hz, 2H), 1.40 (d,  $J = 7.2$  Hz, 3H); MS (ESI):  $m/z$  (M+H)<sup>+</sup> 302.0698.

### **Ethyl 4-((4-methyl-3-nitrophenyl)amino)-6-(1H-pyrazol-1-yl)quinoline-3-carboxylate (CYF-2-6)**

To a solution of **CYF-2-5** (0.30 g, 1 mmol) in 1,4-dioxane (3 mL) at room temperature in a sealed tube was added 4-methyl-3-nitroaniline (0.18 g, 1.2 mmol). The resultant solution was heated to 110 °C for 10 h. After the mixture was cooled to room temperature, a solution of NaOH (1N) was added to neutralize the solution followed by dilution with water and extraction with ethyl acetate. After the organic extracts were dried over Na<sub>2</sub>SO<sub>4</sub>, the solvents were removed and the residue was purified by flash column chromatography to furnish product **CYF-2-6** (0.37 g, 90% yield). <sup>1</sup>H-NMR (400 MHz, DMSO)  $\delta$  9.75 (s, 1H), 8.89 (s, 1H), 8.70 (d,  $J = 2.4$  Hz, 1H), 8.60 (d,  $J = 2.4$  Hz, 1H), 8.37 (dd,  $J = 8.8, 2.0$  Hz, 1H), 8.13 (d,  $J = 9.2$  Hz, 1H), 7.84 (d,  $J = 1.6$  Hz, 1H), 8.68 (d,  $J = 2.0$  Hz, 1H), 7.41 (d,  $J = 8.4$  Hz, 1H), 7.28 (dd,  $J = 8.0, 2.0$  Hz, 1H), 6.64 (d,  $J = 1.6$  Hz, 1H), 3.35 (q,  $J = 6.8$  Hz, 2H), 2.47 (s, 3H), 1.08 (t,  $J = 6.8$  Hz, 3H); MS (ESI):  $m/z$  (M+H)<sup>+</sup> 418.1520.

### **4-((4-methyl-3-nitrophenyl)amino)-6-(1H-pyrazol-1-yl)quinolin-3-ylmethanol (CYF-2-7)**

To a solution of compound **CYF-2-6** (0.33 g, 0.8 mmol) in EtOH/THF (1 mL/3 mL) at 0 °C was added NaBH<sub>4</sub> (0.6g, 16 mmol). The resultant solution was stirred at room temperature for 1 h before being diluted with EtOAc and filtered through Celite. The filtrate was concentrated under vacuum, and the residue was dissolved in EtOAc and brine. After separation, organic layer was dried over MgSO<sub>4</sub> and concentrated under vacuum. The residue was purified by flash column chromatography to afford product **CYF-2-7** (0.18 g, 60% yield). <sup>1</sup>H-NMR (400 MHz, DMSO)  $\delta$  9.01 (s, 1H), 8.90 (s, 1H), 8.60 (s, 1H), 8.45 (s, 1H), 8.28 (d,  $J = 8.8$  Hz, 1H), 8.17 (d,  $J = 9.2$  Hz, 1H), 7.80 (d,  $J = 1.2$  Hz, 1H), 7.32 (s, 1H), 7.30 (d,  $J = 9.2$  Hz, 1H), 6.91 (d,  $J = 8.0$  Hz, 1H), 6.60 (d,  $J =$

## Supplemental Materials

1.6 Hz, 1H), 5.44 (m, 1H), 4.50 (d,  $J = 5.2$  Hz, 2H), 2.41 (s, 3H); MS (ESI):  $m/z$  (M+H)<sup>+</sup> 376.1404.

### **1-(4-methyl-3-nitrophenyl)-9-(1*H*-pyrazol-1-yl)benzo[*h*][1,6]naphthyridin-2(1*H*)-one (CYF-2-9)**

To a solution of compound **CYF-2-7** (187 mg, 0.5 mmol) in CH<sub>2</sub>Cl<sub>2</sub> (5 mL) at room temperature was added MnO<sub>2</sub> (260 mg, 3 mmol). After 12 h, the reaction mixture was filtered through Celite. The filtrate was concentrated in a sealed tube and dissolved in dry EtOH (5 mL), after which K<sub>2</sub>CO<sub>3</sub> (410 mg, 3 mmol) and triethyl phosphonoacetate (81 mg, 0.36 mmol) were added. The resulting mixture was heated to 110 °C for 6 h before cooling to room temperature. Upon removal of the solvents under vacuum, the residue was diluted with water followed by extraction with EtOAc. The residue was purified by flash column chromatography to provided product **CYF-2-9** (100 mg, 50% yield, two steps). <sup>1</sup>H-NMR (400 MHz, DMSO)  $\delta$  9.16 (s, 1H), 8.35 (d,  $J = 9.2$  Hz, 1H), 8.34 (d,  $J = 1.6$  Hz, 1H), 8.22 - 8.11 (m, 3H), 8.00 - 7.73 (d,  $J = 9.2$  Hz, 2H), 7.64 (s, 1H), 7.28 (d,  $J = 2.0$  Hz, 1H), 6.99 (d,  $J = 9.2$  Hz, 1H), 6.53 (dd,  $J = 2.4, 2.0$  Hz, 1H), 2.71 (s, 3H); MS (ESI):  $m/z$  (M+H)<sup>+</sup> 398.1257.

### **1-(3-amino-4-methylphenyl)-9-(1*H*-pyrazol-1-yl)benzo[*h*][1,6]naphthyridin-2 (1*H*)-one (CYF-2-10)**

To a solution of compound **CYF-2-9** (40 mg, 0.1 mmol) in EtOH (2 ml) at room temperature, SnCl<sub>2</sub>·2H<sub>2</sub>O (226 mg, 1 mmol) was added. The resultant solution was refluxed for 1 h. After the mixture was cooled to room temperature, a solution of saturated sodium bicarbonate was added to quench the reaction followed by dilution with water and extraction with ethyl acetate. After the organic extracts were dried over Na<sub>2</sub>SO<sub>4</sub>, the solvents were removed to afford the crude product **CYF-2-10** (24 mg, 60% yield); MS (ESI):  $m/z$  (M+H)<sup>+</sup> 368.1514.

### **N-(2-methyl-5-(2-oxo-9-(1*H*-pyrazol-1-yl)benzo[*h*][1,6]naphthyridin-1(2*H*)-yl)phenyl) acrylamide (CYF-2-11/CHMFL-BTK-11)**

## Supplemental Materials

The crude compound **CYF-2-10** (7.3 mg, 0.02 mmol) was dissolved in dry  $\text{CH}_2\text{Cl}_2$  (0.4 mL) in an ice bath. Diisopropylethylamine (28 mg, 0.06 mmol) was added. After 5 min, acryloyl chloride (3 mg, 0.03 mmol) was added, and the reaction mixture was stirred for additional 5 h. The solvent was evaporated, and the residue was dissolved in ethyl acetate and washed three times with a  $\text{NaHCO}_3$  solution (4%). The organic phase was dried over  $\text{Na}_2\text{SO}_4$ , filtered, and concentrated. The residue was purified by flash column chromatography to afford product **CYF-2-11/CHMFL-BTK-11** (7.0 g, 80% yield).  $^1\text{H-NMR}$  (400 MHz, DMSO)  $\delta$  9.79(s, 1H), 9.14(s, 1H), 8.32 (d,  $J = 9.6$  HZ, 1H), 8.20 (dd,  $J = 8.8, 2.0$  HZ, 1H), 8.15 (d,  $J = 9.2$  HZ, 1H), 7.71-7.69 (m, 2H), 7.63 (s, 1H), 7.54 (d,  $J = 8.4$  HZ, 1H), 7.24 (d,  $J = 7.6$  HZ, 1H), 7.13 (s, 1H), 6.95 (d,  $J = 9.2$  HZ, 1H), 6.57-6.50 (m, 2H), 6.20 (d,  $J = 17.2$  HZ, 1H), 5.76 (d,  $J = 10.8$  HZ, 1H), 2.42 (s, 3H); MS (ESI):  $m/z$  ( $\text{M}+\text{H}$ ) $^+$  422.1621.

**Supplemental Figure 1:** Quantification of CHMFL-BTK-11/12 effect on the in vitro BTK wt/C481S mutant assay

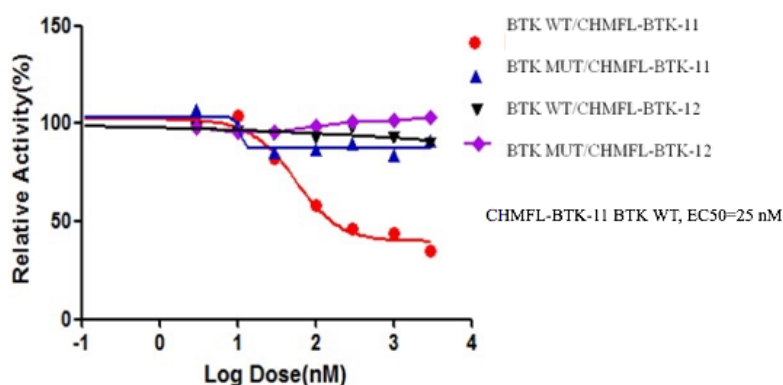

**Supplemental Figure 2:** CHMFL-BTK-11/12 and PCI-32765 effect on the phospho-P65 in the anti-IgM stimulated human PBMC.

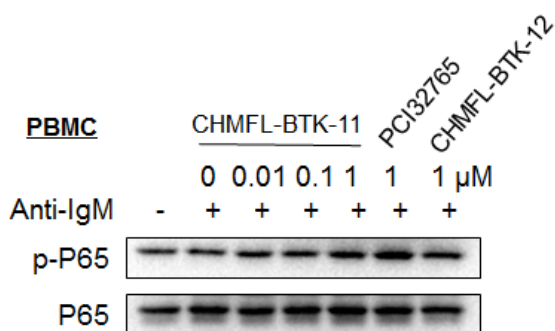

Supplemental Materials

**Supplemental Figure 3:** CHMFL-BTK-11/12, PCI-32765 and MTX effects on the secretion of IL-1 $\beta$ , IL-17A and TNF- $\alpha$ .

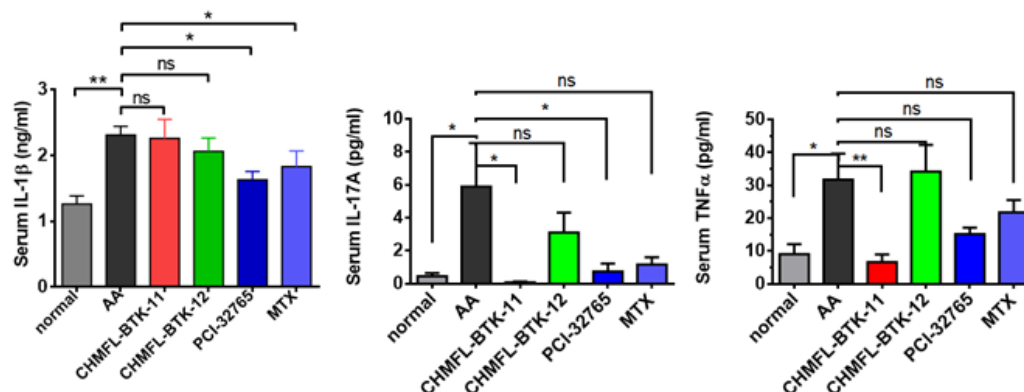

**Supplemental Figure 4:** CHMFL-BTK-11/12, PCI-32765 anti-proliferative effects on the human MH7A cell line and rat arthritis synovial cells.

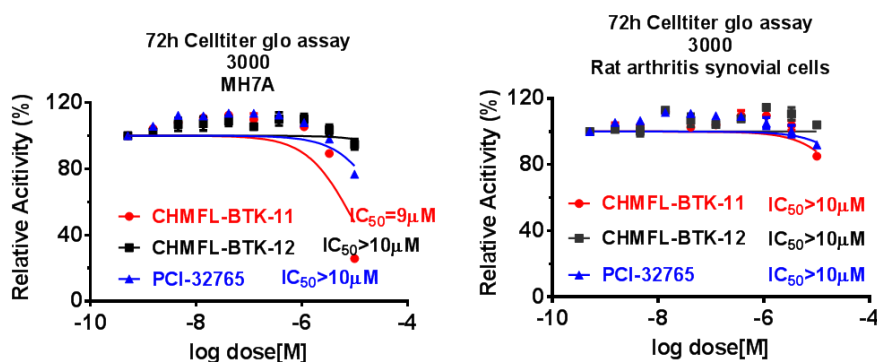

**Supplemental Table 1:** Kinome wide selectivity profiling of CHMFL-BTK-11

| Compound Name | DiscoverX Gene Symbol         | Percent Control | Compound Concentration (nM) |
|---------------|-------------------------------|-----------------|-----------------------------|
| CHMFL-BTK-11  | AAK1                          | 62              | 1000                        |
| CHMFL-BTK-11  | ABL1(E255K)-phosphorylated    | 92              | 1000                        |
| CHMFL-BTK-11  | ABL1(F317I)-nonphosphorylated | 100             | 1000                        |
| CHMFL-BTK-11  | ABL1(F317I)-phosphorylated    | 100             | 1000                        |
| CHMFL-BTK-11  | ABL1(F317L)-nonphosphorylated | 96              | 1000                        |
| CHMFL-BTK-11  | ABL1(F317L)-phosphorylated    | 100             | 1000                        |
| CHMFL-BTK-11  | ABL1(H396P)-nonphosphorylated | 100             | 1000                        |
| CHMFL-BTK-11  | ABL1(H396P)-phosphorylated    | 100             | 1000                        |
| CHMFL-BTK-11  | ABL1(M351T)-phosphorylated    | 72              | 1000                        |
| CHMFL-BTK-11  | ABL1(Q252H)-nonphosphorylated | 100             | 1000                        |
| CHMFL-BTK-11  | ABL1(Q252H)-phosphorylated    | 100             | 1000                        |
| CHMFL-BTK-11  | ABL1(T315I)-nonphosphorylated | 79              | 1000                        |
| CHMFL-BTK-11  | ABL1(T315I)-phosphorylated    | 100             | 1000                        |
| CHMFL-BTK-11  | ABL1(Y253F)-phosphorylated    | 89              | 1000                        |
| CHMFL-BTK-11  | ABL1-nonphosphorylated        | 74              | 1000                        |
| CHMFL-BTK-11  | ABL1-phosphorylated           | 78              | 1000                        |
| CHMFL-BTK-11  | ABL2                          | 100             | 1000                        |

## Supplemental Materials

|              |               |     |      |
|--------------|---------------|-----|------|
| CHMFL-BTK-11 | ACVR1         | 100 | 1000 |
| CHMFL-BTK-11 | ACVR1B        | 100 | 1000 |
| CHMFL-BTK-11 | ACVR2A        | 100 | 1000 |
| CHMFL-BTK-11 | ACVR2B        | 95  | 1000 |
| CHMFL-BTK-11 | ACVRL1        | 90  | 1000 |
| CHMFL-BTK-11 | ADCK3         | 96  | 1000 |
| CHMFL-BTK-11 | ADCK4         | 100 | 1000 |
| CHMFL-BTK-11 | AKT1          | 96  | 1000 |
| CHMFL-BTK-11 | AKT2          | 100 | 1000 |
| CHMFL-BTK-11 | AKT3          | 100 | 1000 |
| CHMFL-BTK-11 | ALK           | 100 | 1000 |
| CHMFL-BTK-11 | ALK(C1156Y)   | 94  | 1000 |
| CHMFL-BTK-11 | ALK(L1196M)   | 88  | 1000 |
| CHMFL-BTK-11 | AMPK-alpha1   | 100 | 1000 |
| CHMFL-BTK-11 | AMPK-alpha2   | 86  | 1000 |
| CHMFL-BTK-11 | ANKK1         | 81  | 1000 |
| CHMFL-BTK-11 | ARK5          | 100 | 1000 |
| CHMFL-BTK-11 | ASK1          | 90  | 1000 |
| CHMFL-BTK-11 | ASK2          | 100 | 1000 |
| CHMFL-BTK-11 | AURKA         | 71  | 1000 |
| CHMFL-BTK-11 | AURKB         | 94  | 1000 |
| CHMFL-BTK-11 | AURKC         | 98  | 1000 |
| CHMFL-BTK-11 | AXL           | 100 | 1000 |
| CHMFL-BTK-11 | BIKE          | 91  | 1000 |
| CHMFL-BTK-11 | BLK           | 30  | 1000 |
| CHMFL-BTK-11 | BMPR1A        | 100 | 1000 |
| CHMFL-BTK-11 | BMPR1B        | 97  | 1000 |
| CHMFL-BTK-11 | BMPR2         | 100 | 1000 |
| CHMFL-BTK-11 | BMX           | 23  | 1000 |
| CHMFL-BTK-11 | BRAF          | 93  | 1000 |
| CHMFL-BTK-11 | BRAF(V600E)   | 100 | 1000 |
| CHMFL-BTK-11 | BRK           | 100 | 1000 |
| CHMFL-BTK-11 | BRSK1         | 100 | 1000 |
| CHMFL-BTK-11 | BRSK2         | 86  | 1000 |
| CHMFL-BTK-11 | BTK           | 8.2 | 1000 |
| CHMFL-BTK-11 | BUB1          | 83  | 1000 |
| CHMFL-BTK-11 | CAMK1         | 98  | 1000 |
| CHMFL-BTK-11 | CAMK1D        | 100 | 1000 |
| CHMFL-BTK-11 | CAMK1G        | 84  | 1000 |
| CHMFL-BTK-11 | CAMK2A        | 100 | 1000 |
| CHMFL-BTK-11 | CAMK2B        | 100 | 1000 |
| CHMFL-BTK-11 | CAMK2D        | 80  | 1000 |
| CHMFL-BTK-11 | CAMK2G        | 73  | 1000 |
| CHMFL-BTK-11 | CAMK4         | 91  | 1000 |
| CHMFL-BTK-11 | CAMKK1        | 78  | 1000 |
| CHMFL-BTK-11 | CAMKK2        | 78  | 1000 |
| CHMFL-BTK-11 | CASK          | 86  | 1000 |
| CHMFL-BTK-11 | CDC2L1        | 100 | 1000 |
| CHMFL-BTK-11 | CDC2L2        | 100 | 1000 |
| CHMFL-BTK-11 | CDC2L5        | 98  | 1000 |
| CHMFL-BTK-11 | CDK11         | 89  | 1000 |
| CHMFL-BTK-11 | CDK2          | 100 | 1000 |
| CHMFL-BTK-11 | CDK3          | 100 | 1000 |
| CHMFL-BTK-11 | CDK4-cyclinD1 | 97  | 1000 |
| CHMFL-BTK-11 | CDK4-cyclinD3 | 100 | 1000 |
| CHMFL-BTK-11 | CDK5          | 100 | 1000 |
| CHMFL-BTK-11 | CDK7          | 89  | 1000 |



## Supplemental Materials

|              |                           |     |      |
|--------------|---------------------------|-----|------|
| CHMFL-BTK-11 | CDK8                      | 91  | 1000 |
| CHMFL-BTK-11 | CDK9                      | 96  | 1000 |
| CHMFL-BTK-11 | CDKL1                     | 93  | 1000 |
| CHMFL-BTK-11 | CDKL2                     | 81  | 1000 |
| CHMFL-BTK-11 | CDKL3                     | 90  | 1000 |
| CHMFL-BTK-11 | CDKL5                     | 100 | 1000 |
| CHMFL-BTK-11 | CHEK1                     | 100 | 1000 |
| CHMFL-BTK-11 | CHEK2                     | 100 | 1000 |
| CHMFL-BTK-11 | CIT                       | 98  | 1000 |
| CHMFL-BTK-11 | CLK1                      | 92  | 1000 |
| CHMFL-BTK-11 | CLK2                      | 100 | 1000 |
| CHMFL-BTK-11 | CLK3                      | 100 | 1000 |
| CHMFL-BTK-11 | CLK4                      | 90  | 1000 |
| CHMFL-BTK-11 | CSF1R                     | 91  | 1000 |
| CHMFL-BTK-11 | CSF1R-autoinhibited       | 70  | 1000 |
| CHMFL-BTK-11 | CSK                       | 100 | 1000 |
| CHMFL-BTK-11 | CSNK1A1                   | 100 | 1000 |
| CHMFL-BTK-11 | CSNK1A1L                  | 100 | 1000 |
| CHMFL-BTK-11 | CSNK1D                    | 100 | 1000 |
| CHMFL-BTK-11 | CSNK1E                    | 100 | 1000 |
| CHMFL-BTK-11 | CSNK1G1                   | 100 | 1000 |
| CHMFL-BTK-11 | CSNK1G2                   | 100 | 1000 |
| CHMFL-BTK-11 | CSNK1G3                   | 100 | 1000 |
| CHMFL-BTK-11 | CSNK2A1                   | 92  | 1000 |
| CHMFL-BTK-11 | CSNK2A2                   | 52  | 1000 |
| CHMFL-BTK-11 | CTK                       | 65  | 1000 |
| CHMFL-BTK-11 | DAPK1                     | 100 | 1000 |
| CHMFL-BTK-11 | DAPK2                     | 100 | 1000 |
| CHMFL-BTK-11 | DAPK3                     | 100 | 1000 |
| CHMFL-BTK-11 | DCAMKL1                   | 91  | 1000 |
| CHMFL-BTK-11 | DCAMKL2                   | 100 | 1000 |
| CHMFL-BTK-11 | DCAMKL3                   | 88  | 1000 |
| CHMFL-BTK-11 | DDR1                      | 100 | 1000 |
| CHMFL-BTK-11 | DDR2                      | 99  | 1000 |
| CHMFL-BTK-11 | DLK                       | 100 | 1000 |
| CHMFL-BTK-11 | DMPK                      | 100 | 1000 |
| CHMFL-BTK-11 | DMPK2                     | 99  | 1000 |
| CHMFL-BTK-11 | DRAK1                     | 96  | 1000 |
| CHMFL-BTK-11 | DRAK2                     | 95  | 1000 |
| CHMFL-BTK-11 | DYRK1A                    | 100 | 1000 |
| CHMFL-BTK-11 | DYRK1B                    | 65  | 1000 |
| CHMFL-BTK-11 | DYRK2                     | 55  | 1000 |
| CHMFL-BTK-11 | EGFR                      | 88  | 1000 |
| CHMFL-BTK-11 | EGFR(E746-A750del)        | 90  | 1000 |
| CHMFL-BTK-11 | EGFR(G719C)               | 97  | 1000 |
| CHMFL-BTK-11 | EGFR(G719S)               | 88  | 1000 |
| CHMFL-BTK-11 | EGFR(L747-E749del, A750P) | 73  | 1000 |
| CHMFL-BTK-11 | EGFR(L747-S752del, P753S) | 86  | 1000 |
| CHMFL-BTK-11 | EGFR(L747-T751del,Sins)   | 77  | 1000 |
| CHMFL-BTK-11 | EGFR(L858R)               | 70  | 1000 |
| CHMFL-BTK-11 | EGFR(L858R,T790M)         | 42  | 1000 |
| CHMFL-BTK-11 | EGFR(L861Q)               | 71  | 1000 |
| CHMFL-BTK-11 | EGFR(S752-I759del)        | 58  | 1000 |
| CHMFL-BTK-11 | EGFR(T790M)               | 58  | 1000 |
| CHMFL-BTK-11 | EIF2AK1                   | 92  | 1000 |
| CHMFL-BTK-11 | EPHA1                     | 100 | 1000 |
| CHMFL-BTK-11 | EPHA2                     | 88  | 1000 |

## Supplemental Materials

|              |                       |     |      |
|--------------|-----------------------|-----|------|
| CHMFL-BTK-11 | EPHA3                 | 97  | 1000 |
| CHMFL-BTK-11 | EPHA4                 | 100 | 1000 |
| CHMFL-BTK-11 | EPHA5                 | 100 | 1000 |
| CHMFL-BTK-11 | EPHA6                 | 100 | 1000 |
| CHMFL-BTK-11 | EPHA7                 | 97  | 1000 |
| CHMFL-BTK-11 | EPHA8                 | 92  | 1000 |
| CHMFL-BTK-11 | EPHB1                 | 100 | 1000 |
| CHMFL-BTK-11 | EPHB2                 | 89  | 1000 |
| CHMFL-BTK-11 | EPHB3                 | 97  | 1000 |
| CHMFL-BTK-11 | EPHB4                 | 100 | 1000 |
| CHMFL-BTK-11 | EPHB6                 | 87  | 1000 |
| CHMFL-BTK-11 | ERBB2                 | 98  | 1000 |
| CHMFL-BTK-11 | ERBB3                 | 90  | 1000 |
| CHMFL-BTK-11 | ERBB4                 | 91  | 1000 |
| CHMFL-BTK-11 | ERK1                  | 100 | 1000 |
| CHMFL-BTK-11 | ERK2                  | 100 | 1000 |
| CHMFL-BTK-11 | ERK3                  | 100 | 1000 |
| CHMFL-BTK-11 | ERK4                  | 96  | 1000 |
| CHMFL-BTK-11 | ERK5                  | 100 | 1000 |
| CHMFL-BTK-11 | ERK8                  | 99  | 1000 |
| CHMFL-BTK-11 | ERN1                  | 76  | 1000 |
| CHMFL-BTK-11 | FAK                   | 100 | 1000 |
| CHMFL-BTK-11 | FER                   | 98  | 1000 |
| CHMFL-BTK-11 | FES                   | 90  | 1000 |
| CHMFL-BTK-11 | FGFR1                 | 88  | 1000 |
| CHMFL-BTK-11 | FGFR2                 | 88  | 1000 |
| CHMFL-BTK-11 | FGFR3                 | 89  | 1000 |
| CHMFL-BTK-11 | FGFR3(G697C)          | 100 | 1000 |
| CHMFL-BTK-11 | FGFR4                 | 100 | 1000 |
| CHMFL-BTK-11 | FGR                   | 100 | 1000 |
| CHMFL-BTK-11 | FLT1                  | 88  | 1000 |
| CHMFL-BTK-11 | FLT3                  | 100 | 1000 |
| CHMFL-BTK-11 | FLT3(D835H)           | 100 | 1000 |
| CHMFL-BTK-11 | FLT3(D835Y)           | 100 | 1000 |
| CHMFL-BTK-11 | FLT3(ITD)             | 89  | 1000 |
| CHMFL-BTK-11 | FLT3(K663Q)           | 100 | 1000 |
| CHMFL-BTK-11 | FLT3(N841I)           | 100 | 1000 |
| CHMFL-BTK-11 | FLT3(R834Q)           | 99  | 1000 |
| CHMFL-BTK-11 | FLT3-autoinhibited    | 100 | 1000 |
| CHMFL-BTK-11 | FLT4                  | 100 | 1000 |
| CHMFL-BTK-11 | FRK                   | 100 | 1000 |
| CHMFL-BTK-11 | FYN                   | 99  | 1000 |
| CHMFL-BTK-11 | GAK                   | 100 | 1000 |
| CHMFL-BTK-11 | GCN2(Kin.Dom.2,S808G) | 100 | 1000 |
| CHMFL-BTK-11 | GRK1                  | 71  | 1000 |
| CHMFL-BTK-11 | GRK4                  | 94  | 1000 |
| CHMFL-BTK-11 | GRK7                  | 100 | 1000 |
| CHMFL-BTK-11 | GSK3A                 | 90  | 1000 |
| CHMFL-BTK-11 | GSK3B                 | 100 | 1000 |
| CHMFL-BTK-11 | HASPIN                | 59  | 1000 |
| CHMFL-BTK-11 | HCK                   | 100 | 1000 |
| CHMFL-BTK-11 | HIPK1                 | 79  | 1000 |
| CHMFL-BTK-11 | HIPK2                 | 96  | 1000 |
| CHMFL-BTK-11 | HIPK3                 | 100 | 1000 |
| CHMFL-BTK-11 | HIPK4                 | 94  | 1000 |
| CHMFL-BTK-11 | HPK1                  | 94  | 1000 |
| CHMFL-BTK-11 | HUNK                  | 86  | 1000 |

## Supplemental Materials

|              |                              |     |      |
|--------------|------------------------------|-----|------|
| CHMFL-BTK-11 | ICK                          | 100 | 1000 |
| CHMFL-BTK-11 | IGF1R                        | 100 | 1000 |
| CHMFL-BTK-11 | IKK-alpha                    | 96  | 1000 |
| CHMFL-BTK-11 | IKK-beta                     | 86  | 1000 |
| CHMFL-BTK-11 | IKK-epsilon                  | 96  | 1000 |
| CHMFL-BTK-11 | INSR                         | 82  | 1000 |
| CHMFL-BTK-11 | INSRR                        | 100 | 1000 |
| CHMFL-BTK-11 | IRAK1                        | 87  | 1000 |
| CHMFL-BTK-11 | IRAK3                        | 98  | 1000 |
| CHMFL-BTK-11 | IRAK4                        | 82  | 1000 |
| CHMFL-BTK-11 | ITK                          | 100 | 1000 |
| CHMFL-BTK-11 | JAK1(JH1domain-catalytic)    | 100 | 1000 |
| CHMFL-BTK-11 | JAK1(JH2domain-pseudokinase) | 82  | 1000 |
| CHMFL-BTK-11 | JAK2(JH1domain-catalytic)    | 78  | 1000 |
| CHMFL-BTK-11 | JAK3(JH1domain-catalytic)    | 5.7 | 1000 |
| CHMFL-BTK-11 | JNK1                         | 72  | 1000 |
| CHMFL-BTK-11 | JNK2                         | 100 | 1000 |
| CHMFL-BTK-11 | JNK3                         | 100 | 1000 |
| CHMFL-BTK-11 | KIT                          | 100 | 1000 |
| CHMFL-BTK-11 | KIT(A829P)                   | 98  | 1000 |
| CHMFL-BTK-11 | KIT(D816H)                   | 100 | 1000 |
| CHMFL-BTK-11 | KIT(D816V)                   | 97  | 1000 |
| CHMFL-BTK-11 | KIT(L576P)                   | 100 | 1000 |
| CHMFL-BTK-11 | KIT(V559D)                   | 100 | 1000 |
| CHMFL-BTK-11 | KIT(V559D,T670I)             | 99  | 1000 |
| CHMFL-BTK-11 | KIT(V559D,V654A)             | 100 | 1000 |
| CHMFL-BTK-11 | KIT-autoinhibited            | 83  | 1000 |
| CHMFL-BTK-11 | LATS1                        | 99  | 1000 |
| CHMFL-BTK-11 | LATS2                        | 100 | 1000 |
| CHMFL-BTK-11 | LCK                          | 100 | 1000 |
| CHMFL-BTK-11 | LIMK1                        | 100 | 1000 |
| CHMFL-BTK-11 | LIMK2                        | 100 | 1000 |
| CHMFL-BTK-11 | LKB1                         | 91  | 1000 |
| CHMFL-BTK-11 | LOK                          | 97  | 1000 |
| CHMFL-BTK-11 | LRRK2                        | 96  | 1000 |
| CHMFL-BTK-11 | LRRK2(G2019S)                | 95  | 1000 |
| CHMFL-BTK-11 | LTK                          | 100 | 1000 |
| CHMFL-BTK-11 | LYN                          | 94  | 1000 |
| CHMFL-BTK-11 | LZK                          | 100 | 1000 |
| CHMFL-BTK-11 | MAK                          | 100 | 1000 |
| CHMFL-BTK-11 | MAP3K1                       | 100 | 1000 |
| CHMFL-BTK-11 | MAP3K15                      | 80  | 1000 |
| CHMFL-BTK-11 | MAP3K2                       | 99  | 1000 |
| CHMFL-BTK-11 | MAP3K3                       | 100 | 1000 |
| CHMFL-BTK-11 | MAP3K4                       | 97  | 1000 |
| CHMFL-BTK-11 | MAP4K2                       | 98  | 1000 |
| CHMFL-BTK-11 | MAP4K3                       | 100 | 1000 |
| CHMFL-BTK-11 | MAP4K4                       | 97  | 1000 |
| CHMFL-BTK-11 | MAP4K5                       | 100 | 1000 |
| CHMFL-BTK-11 | MAPKAPK2                     | 99  | 1000 |
| CHMFL-BTK-11 | MAPKAPK5                     | 100 | 1000 |
| CHMFL-BTK-11 | MARK1                        | 82  | 1000 |
| CHMFL-BTK-11 | MARK2                        | 92  | 1000 |
| CHMFL-BTK-11 | MARK3                        | 100 | 1000 |
| CHMFL-BTK-11 | MARK4                        | 79  | 1000 |
| CHMFL-BTK-11 | MAST1                        | 100 | 1000 |
| CHMFL-BTK-11 | MEK1                         | 100 | 1000 |

## Supplemental Materials

|              |             |     |      |
|--------------|-------------|-----|------|
| CHMFL-BTK-11 | MEK2        | 92  | 1000 |
| CHMFL-BTK-11 | MEK3        | 86  | 1000 |
| CHMFL-BTK-11 | MEK4        | 100 | 1000 |
| CHMFL-BTK-11 | MEK5        | 80  | 1000 |
| CHMFL-BTK-11 | MEK6        | 79  | 1000 |
| CHMFL-BTK-11 | MELK        | 73  | 1000 |
| CHMFL-BTK-11 | MERTK       | 100 | 1000 |
| CHMFL-BTK-11 | MET         | 100 | 1000 |
| CHMFL-BTK-11 | MET(M1250T) | 100 | 1000 |
| CHMFL-BTK-11 | MET(Y1235D) | 100 | 1000 |
| CHMFL-BTK-11 | MINK        | 64  | 1000 |
| CHMFL-BTK-11 | MKK7        | 77  | 1000 |
| CHMFL-BTK-11 | MKNK1       | 92  | 1000 |
| CHMFL-BTK-11 | MKNK2       | 98  | 1000 |
| CHMFL-BTK-11 | MLCK        | 98  | 1000 |
| CHMFL-BTK-11 | MLK1        | 100 | 1000 |
| CHMFL-BTK-11 | MLK2        | 94  | 1000 |
| CHMFL-BTK-11 | MLK3        | 100 | 1000 |
| CHMFL-BTK-11 | MRCKA       | 100 | 1000 |
| CHMFL-BTK-11 | MRCKB       | 100 | 1000 |
| CHMFL-BTK-11 | MST1        | 100 | 1000 |
| CHMFL-BTK-11 | MST1R       | 98  | 1000 |
| CHMFL-BTK-11 | MST2        | 97  | 1000 |
| CHMFL-BTK-11 | MST3        | 100 | 1000 |
| CHMFL-BTK-11 | MST4        | 96  | 1000 |
| CHMFL-BTK-11 | MTOR        | 62  | 1000 |
| CHMFL-BTK-11 | MUSK        | 100 | 1000 |
| CHMFL-BTK-11 | MYLK        | 82  | 1000 |
| CHMFL-BTK-11 | MYLK2       | 100 | 1000 |
| CHMFL-BTK-11 | MYLK4       | 100 | 1000 |
| CHMFL-BTK-11 | MYO3A       | 100 | 1000 |
| CHMFL-BTK-11 | MYO3B       | 90  | 1000 |
| CHMFL-BTK-11 | NDR1        | 68  | 1000 |
| CHMFL-BTK-11 | NDR2        | 99  | 1000 |
| CHMFL-BTK-11 | NEK1        | 82  | 1000 |
| CHMFL-BTK-11 | NEK10       | 97  | 1000 |
| CHMFL-BTK-11 | NEK11       | 96  | 1000 |
| CHMFL-BTK-11 | NEK2        | 100 | 1000 |
| CHMFL-BTK-11 | NEK3        | 87  | 1000 |
| CHMFL-BTK-11 | NEK4        | 100 | 1000 |
| CHMFL-BTK-11 | NEK5        | 73  | 1000 |
| CHMFL-BTK-11 | NEK6        | 100 | 1000 |
| CHMFL-BTK-11 | NEK7        | 100 | 1000 |
| CHMFL-BTK-11 | NEK9        | 100 | 1000 |
| CHMFL-BTK-11 | NIK         | 100 | 1000 |
| CHMFL-BTK-11 | NIM1        | 100 | 1000 |
| CHMFL-BTK-11 | NLK         | 100 | 1000 |
| CHMFL-BTK-11 | OSR1        | 96  | 1000 |
| CHMFL-BTK-11 | p38-alpha   | 76  | 1000 |
| CHMFL-BTK-11 | p38-beta    | 100 | 1000 |
| CHMFL-BTK-11 | p38-delta   | 96  | 1000 |
| CHMFL-BTK-11 | p38-gamma   | 79  | 1000 |
| CHMFL-BTK-11 | PAK1        | 100 | 1000 |
| CHMFL-BTK-11 | PAK2        | 99  | 1000 |
| CHMFL-BTK-11 | PAK3        | 94  | 1000 |
| CHMFL-BTK-11 | PAK4        | 95  | 1000 |
| CHMFL-BTK-11 | PAK6        | 100 | 1000 |

## Supplemental Materials

|              |                       |     |      |
|--------------|-----------------------|-----|------|
| CHMFL-BTK-11 | PAK7                  | 100 | 1000 |
| CHMFL-BTK-11 | PCTK1                 | 100 | 1000 |
| CHMFL-BTK-11 | PCTK2                 | 94  | 1000 |
| CHMFL-BTK-11 | PCTK3                 | 90  | 1000 |
| CHMFL-BTK-11 | PDGFRA                | 100 | 1000 |
| CHMFL-BTK-11 | PDGFRB                | 100 | 1000 |
| CHMFL-BTK-11 | PDPK1                 | 90  | 1000 |
| CHMFL-BTK-11 | PFCDPK1(P.falciparum) | 97  | 1000 |
| CHMFL-BTK-11 | PFPK5(P.falciparum)   | 100 | 1000 |
| CHMFL-BTK-11 | PFTAIRE2              | 100 | 1000 |
| CHMFL-BTK-11 | PFTK1                 | 100 | 1000 |
| CHMFL-BTK-11 | PHKG1                 | 100 | 1000 |
| CHMFL-BTK-11 | PHKG2                 | 100 | 1000 |
| CHMFL-BTK-11 | PIK3C2B               | 100 | 1000 |
| CHMFL-BTK-11 | PIK3C2G               | 95  | 1000 |
| CHMFL-BTK-11 | PIK3CA                | 100 | 1000 |
| CHMFL-BTK-11 | PIK3CA(C420R)         | 74  | 1000 |
| CHMFL-BTK-11 | PIK3CA(E542K)         | 91  | 1000 |
| CHMFL-BTK-11 | PIK3CA(E545A)         | 76  | 1000 |
| CHMFL-BTK-11 | PIK3CA(E545K)         | 69  | 1000 |
| CHMFL-BTK-11 | PIK3CA(H1047L)        | 85  | 1000 |
| CHMFL-BTK-11 | PIK3CA(H1047Y)        | 82  | 1000 |
| CHMFL-BTK-11 | PIK3CA(I800L)         | 62  | 1000 |
| CHMFL-BTK-11 | PIK3CA(M1043I)        | 99  | 1000 |
| CHMFL-BTK-11 | PIK3CA(Q546K)         | 97  | 1000 |
| CHMFL-BTK-11 | PIK3CB                | 100 | 1000 |
| CHMFL-BTK-11 | PIK3CD                | 100 | 1000 |
| CHMFL-BTK-11 | PIK3CG                | 73  | 1000 |
| CHMFL-BTK-11 | PIK4CB                | 100 | 1000 |
| CHMFL-BTK-11 | PIM1                  | 82  | 1000 |
| CHMFL-BTK-11 | PIM2                  | 100 | 1000 |
| CHMFL-BTK-11 | PIM3                  | 95  | 1000 |
| CHMFL-BTK-11 | PIP5K1A               | 100 | 1000 |
| CHMFL-BTK-11 | PIP5K1C               | 82  | 1000 |
| CHMFL-BTK-11 | PIP5K2B               | 100 | 1000 |
| CHMFL-BTK-11 | PIP5K2C               | 90  | 1000 |
| CHMFL-BTK-11 | PKAC-alpha            | 98  | 1000 |
| CHMFL-BTK-11 | PKAC-beta             | 100 | 1000 |
| CHMFL-BTK-11 | PKMYT1                | 94  | 1000 |
| CHMFL-BTK-11 | PKN1                  | 100 | 1000 |
| CHMFL-BTK-11 | PKN2                  | 100 | 1000 |
| CHMFL-BTK-11 | PKNB(M.tuberculosis)  | 69  | 1000 |
| CHMFL-BTK-11 | PLK1                  | 99  | 1000 |
| CHMFL-BTK-11 | PLK2                  | 91  | 1000 |
| CHMFL-BTK-11 | PLK3                  | 100 | 1000 |
| CHMFL-BTK-11 | PLK4                  | 56  | 1000 |
| CHMFL-BTK-11 | PRKCD                 | 86  | 1000 |
| CHMFL-BTK-11 | PRKCE                 | 97  | 1000 |
| CHMFL-BTK-11 | PRKCH                 | 84  | 1000 |
| CHMFL-BTK-11 | PRKCI                 | 69  | 1000 |
| CHMFL-BTK-11 | PRKCQ                 | 100 | 1000 |
| CHMFL-BTK-11 | PRKD1                 | 94  | 1000 |
| CHMFL-BTK-11 | PRKD2                 | 100 | 1000 |
| CHMFL-BTK-11 | PRKD3                 | 100 | 1000 |
| CHMFL-BTK-11 | PRKG1                 | 100 | 1000 |
| CHMFL-BTK-11 | PRKG2                 | 98  | 1000 |
| CHMFL-BTK-11 | PRKR                  | 80  | 1000 |

## Supplemental Materials

|              |                               |     |      |
|--------------|-------------------------------|-----|------|
| CHMFL-BTK-11 | PRKX                          | 100 | 1000 |
| CHMFL-BTK-11 | PRP4                          | 93  | 1000 |
| CHMFL-BTK-11 | PYK2                          | 100 | 1000 |
| CHMFL-BTK-11 | QSK                           | 92  | 1000 |
| CHMFL-BTK-11 | RAF1                          | 100 | 1000 |
| CHMFL-BTK-11 | RET                           | 100 | 1000 |
| CHMFL-BTK-11 | RET(M918T)                    | 100 | 1000 |
| CHMFL-BTK-11 | RET(V804L)                    | 97  | 1000 |
| CHMFL-BTK-11 | RET(V804M)                    | 100 | 1000 |
| CHMFL-BTK-11 | RIOK1                         | 66  | 1000 |
| CHMFL-BTK-11 | RIOK2                         | 87  | 1000 |
| CHMFL-BTK-11 | RIOK3                         | 80  | 1000 |
| CHMFL-BTK-11 | RIPK1                         | 90  | 1000 |
| CHMFL-BTK-11 | RIPK2                         | 100 | 1000 |
| CHMFL-BTK-11 | RIPK4                         | 100 | 1000 |
| CHMFL-BTK-11 | RIPK5                         | 99  | 1000 |
| CHMFL-BTK-11 | ROCK1                         | 89  | 1000 |
| CHMFL-BTK-11 | ROCK2                         | 97  | 1000 |
| CHMFL-BTK-11 | ROS1                          | 94  | 1000 |
| CHMFL-BTK-11 | RPS6KA4(Kin.Dom.1-N-terminal) | 100 | 1000 |
| CHMFL-BTK-11 | RPS6KA4(Kin.Dom.2-C-terminal) | 100 | 1000 |
| CHMFL-BTK-11 | RPS6KA5(Kin.Dom.1-N-terminal) | 94  | 1000 |
| CHMFL-BTK-11 | RPS6KA5(Kin.Dom.2-C-terminal) | 89  | 1000 |
| CHMFL-BTK-11 | RSK1(Kin.Dom.1-N-terminal)    | 82  | 1000 |
| CHMFL-BTK-11 | RSK1(Kin.Dom.2-C-terminal)    | 100 | 1000 |
| CHMFL-BTK-11 | RSK2(Kin.Dom.1-N-terminal)    | 85  | 1000 |
| CHMFL-BTK-11 | RSK2(Kin.Dom.2-C-terminal)    | 100 | 1000 |
| CHMFL-BTK-11 | RSK3(Kin.Dom.1-N-terminal)    | 100 | 1000 |
| CHMFL-BTK-11 | RSK3(Kin.Dom.2-C-terminal)    | 100 | 1000 |
| CHMFL-BTK-11 | RSK4(Kin.Dom.1-N-terminal)    | 91  | 1000 |
| CHMFL-BTK-11 | RSK4(Kin.Dom.2-C-terminal)    | 100 | 1000 |
| CHMFL-BTK-11 | S6K1                          | 100 | 1000 |
| CHMFL-BTK-11 | SBK1                          | 81  | 1000 |
| CHMFL-BTK-11 | SGK                           | 65  | 1000 |
| CHMFL-BTK-11 | SgK110                        | 90  | 1000 |
| CHMFL-BTK-11 | SGK2                          | 85  | 1000 |
| CHMFL-BTK-11 | SGK3                          | 86  | 1000 |
| CHMFL-BTK-11 | SIK                           | 100 | 1000 |
| CHMFL-BTK-11 | SIK2                          | 98  | 1000 |
| CHMFL-BTK-11 | SLK                           | 100 | 1000 |
| CHMFL-BTK-11 | SNARK                         | 90  | 1000 |
| CHMFL-BTK-11 | SNRK                          | 94  | 1000 |
| CHMFL-BTK-11 | SRC                           | 98  | 1000 |
| CHMFL-BTK-11 | SRMS                          | 88  | 1000 |
| CHMFL-BTK-11 | SRPK1                         | 100 | 1000 |
| CHMFL-BTK-11 | SRPK2                         | 100 | 1000 |
| CHMFL-BTK-11 | SRPK3                         | 96  | 1000 |
| CHMFL-BTK-11 | STK16                         | 91  | 1000 |
| CHMFL-BTK-11 | STK33                         | 89  | 1000 |
| CHMFL-BTK-11 | STK35                         | 100 | 1000 |
| CHMFL-BTK-11 | STK36                         | 97  | 1000 |
| CHMFL-BTK-11 | STK39                         | 72  | 1000 |
| CHMFL-BTK-11 | SYK                           | 93  | 1000 |
| CHMFL-BTK-11 | TAK1                          | 98  | 1000 |
| CHMFL-BTK-11 | TAOK1                         | 100 | 1000 |
| CHMFL-BTK-11 | TAOK2                         | 91  | 1000 |
| CHMFL-BTK-11 | TAOK3                         | 93  | 1000 |

## Supplemental Materials

|              |                               |     |      |
|--------------|-------------------------------|-----|------|
| CHMFL-BTK-11 | TBK1                          | 81  | 1000 |
| CHMFL-BTK-11 | TEC                           | 56  | 1000 |
| CHMFL-BTK-11 | TESK1                         | 97  | 1000 |
| CHMFL-BTK-11 | TGFBR1                        | 100 | 1000 |
| CHMFL-BTK-11 | TGFBR2                        | 93  | 1000 |
| CHMFL-BTK-11 | TIE1                          | 100 | 1000 |
| CHMFL-BTK-11 | TIE2                          | 100 | 1000 |
| CHMFL-BTK-11 | TLK1                          | 100 | 1000 |
| CHMFL-BTK-11 | TLK2                          | 78  | 1000 |
| CHMFL-BTK-11 | TNIK                          | 99  | 1000 |
| CHMFL-BTK-11 | TNK1                          | 100 | 1000 |
| CHMFL-BTK-11 | TNK2                          | 100 | 1000 |
| CHMFL-BTK-11 | TNNI3K                        | 100 | 1000 |
| CHMFL-BTK-11 | TRKA                          | 97  | 1000 |
| CHMFL-BTK-11 | TRKB                          | 100 | 1000 |
| CHMFL-BTK-11 | TRKC                          | 93  | 1000 |
| CHMFL-BTK-11 | TRPM6                         | 100 | 1000 |
| CHMFL-BTK-11 | TSSK1B                        | 100 | 1000 |
| CHMFL-BTK-11 | TTK                           | 100 | 1000 |
| CHMFL-BTK-11 | TXK                           | 51  | 1000 |
| CHMFL-BTK-11 | TYK2(JH1 domain-catalytic)    | 92  | 1000 |
| CHMFL-BTK-11 | TYK2(JH2 domain-pseudokinase) | 97  | 1000 |
| CHMFL-BTK-11 | TYRO3                         | 88  | 1000 |
| CHMFL-BTK-11 | ULK1                          | 100 | 1000 |
| CHMFL-BTK-11 | ULK2                          | 100 | 1000 |
| CHMFL-BTK-11 | ULK3                          | 86  | 1000 |
| CHMFL-BTK-11 | VEGFR2                        | 100 | 1000 |
| CHMFL-BTK-11 | VRK2                          | 95  | 1000 |
| CHMFL-BTK-11 | WEE1                          | 100 | 1000 |
| CHMFL-BTK-11 | WEE2                          | 100 | 1000 |
| CHMFL-BTK-11 | WNK1                          | 93  | 1000 |
| CHMFL-BTK-11 | WNK3                          | 100 | 1000 |
| CHMFL-BTK-11 | YANK1                         | 80  | 1000 |
| CHMFL-BTK-11 | YANK2                         | 91  | 1000 |
| CHMFL-BTK-11 | YANK3                         | 100 | 1000 |
| CHMFL-BTK-11 | YES                           | 100 | 1000 |
| CHMFL-BTK-11 | YSK1                          | 79  | 1000 |
| CHMFL-BTK-11 | YSK4                          | 97  | 1000 |
| CHMFL-BTK-11 | ZAK                           | 79  | 1000 |
| CHMFL-BTK-11 | ZAP70                         | 100 | 1000 |

**Supplemental Table 2** The standards of arthritis global assessment\* of AA rats

|                  | <b>0</b>                      | <b>1</b>                       | <b>2</b>                        |
|------------------|-------------------------------|--------------------------------|---------------------------------|
| <b>ear</b>       | no nodules                    | "arthritis" nodules in one ear | "arthritis" nodules in two ears |
| <b>nose</b>      | no connective tissue swelling | connective tissue swelling     | -                               |
| <b>tail</b>      | no nodules                    | "arthritis" nodules            | -                               |
| <b>front paw</b> | no swelling                   | a front paw swelling           | two front paw swelling          |
| <b>hind paw</b>  | no swelling                   | a hind paw swelling            | two hind paw swelling           |

\*Each rat is awarded 8 points at most.

## Supplemental Materials

**Supplemental Table 3** The evaluation standards of arthritis index\* of AA rats

| <b>points</b> | <b>Symptoms</b>                                                                               |
|---------------|-----------------------------------------------------------------------------------------------|
| <b>0</b>      | normal                                                                                        |
| <b>1</b>      | Erythema and slight swelling of ankle                                                         |
| <b>2</b>      | Erythema and slight swelling of ankle and metatarsophalangeal joints (or metacarpal joints)   |
| <b>3</b>      | Erythema and moderate swelling of ankle and metatarsophalangeal joints (or metacarpal joints) |
| <b>4</b>      | Erythema and severe swelling of ankle and metatarsophalangeal joints                          |

\*Each rat has 4 paw, and is awarded 16 points at most.

**Supplemental Table 4** The evaluation standards of quantification of H&E staining

| <b>points</b> | <b>Symptoms</b>                                                                              |
|---------------|----------------------------------------------------------------------------------------------|
| <b>0</b>      | normal ankle joint                                                                           |
| <b>1</b>      | occasional synovial hyperplasia                                                              |
| <b>2</b>      | definite arthritis with a few layers of flat to rounded synovial lining                      |
| <b>3</b>      | clear hyperplasia of the synovium with three or more layers of loosely arranged lining cells |
| <b>4</b>      | severe synovitis with erosions of articular cartilages and subchondral bones                 |
